# Supplementary figures and images for: Differentiation capacity and maintenance of differentiated phenotypes of human mesenchymal stromal cells cultured on two distinct types of 3D polymeric scaffolds
Source: Royal Society of Chemistry journal article supplement (doi:10.1039/c5ib00177c), 2015-01-01

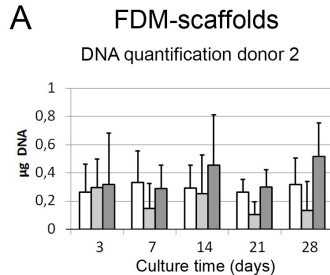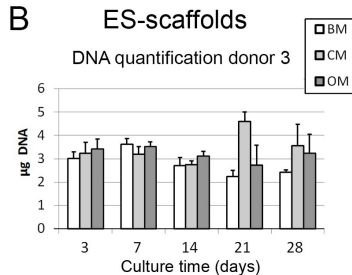

Supplement: c5ib00177c10.pdf [file c5ib00177c10.pdf]

## Donor 4 Gene expression in 2D on TCPS

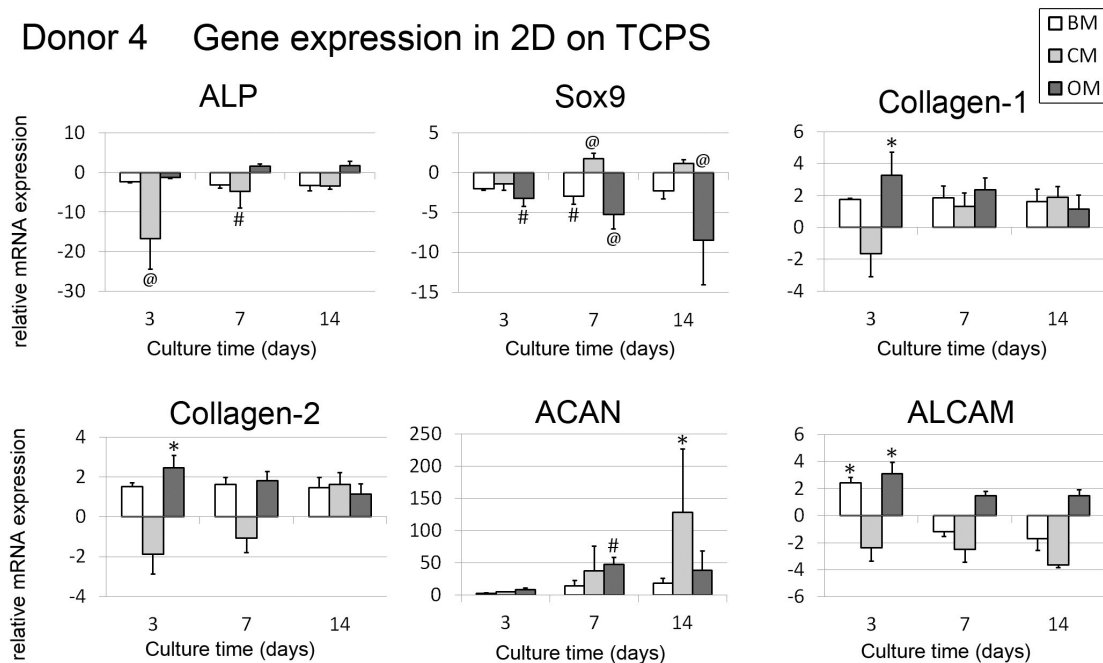

Supplement: c5ib00177c5.pdf [file c5ib00177c5.pdf]

A

### FDM-scaffolds

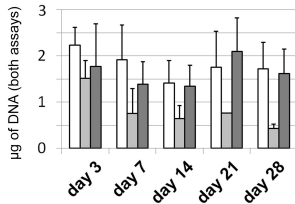

B

### ES-scaffolds

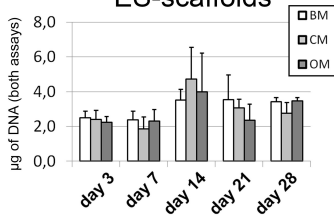

Supplement: c5ib00177c8.pdf [file c5ib00177c8.pdf]
